# Supplementary material
Source: publisher figshare collection journal article supplement (https://diabetesjournals.figshare.com/articles/dataset/_/22358173)
Supplement: Supplementary file 1 [file 1]

**Supplemental Table 1:** Comparison of tested and not tested individuals.

| Characteristics at baseline    | Tested              | Not Tested        |          |
|--------------------------------|---------------------|-------------------|----------|
|                                | Persons             | Persons           | p-value* |
| <b>All</b>                     | 1,115,716           | 124,178           |          |
| <b>Age group, yrs</b>          |                     |                   | <1e-16   |
| 0-4                            | 190,021 (17,03 %)   | 95,405 (76,83 %)  |          |
| 5-10                           | 347,109 (31,11 %)   | 15,612 (12,57 %)  |          |
| 11-17                          | 578,586 (51,86 %)   | 13,161 (10,6 %)   |          |
| <b>Sex</b>                     |                     |                   | 0.03     |
| Male                           | 570,743 (51,15 %)   | 63,121 (50,83 %)  |          |
| Female                         | 544973 (48,85 %)    | 61,057 (48,17)    |          |
| <b>Comorbidity</b>             |                     |                   | <1e-16   |
| No                             | 1,049,799 (94,09 %) | 122,929 (98,99 %) |          |
| Yes                            | 65,917 (5,91 %)     | 1,249 (1,01 %)    |          |
| <b>Vaccine doses received</b>  |                     |                   | <1e-16   |
| 0                              | 594,631 (53,3 %)    | 117,591 (94,7 %)  |          |
| 1                              | 55,421 (4,97 %)     | 808 (0.65 %)      |          |
| 2+                             | 465,664 (41,74 %)   | 5,779 (4,65 %)    |          |
| <b>Parental history of T1D</b> |                     |                   | <1e-16   |
| No                             | 1,099,949 (98,59 %) | 122,898 (98,97 %) |          |
| Yes                            | 15,767 (1,41 %)     | 1,280 (1,03 %)    |          |

\* Chi-square test
